# Supplementary material for: Highly Semiconducting One‐Dimensional Porous ZnO Nanorod Array Nanogenerators for Mechanical Energy Harvesting Functions
Source: Hindawi journal article supplement (doi:10.1155/2024/5546570), 2024-01-01
Supplement: f1 [file 5546570.f1.doc]

**Supporting Information**

**Highly Semiconducting One Dimensional Porous ZnO Nanorod Arrays Nanogenerators for Mechanical Energy Harvesting Functions**

Dong Jin Lee1, Ganesan Mohan Kumar1, Deuk Young Kim1,2, Pugazhendi Ilanchezhiyan1*

1Quantum-Functional Semiconductor Research Center (QSRC), Institute of Future Technology, Dongguk University-Seoul, Seoul, Republic of Korea

2Division of Physics and Semiconductor Science, Dongguk University-Seoul, Seoul,
Republic of Korea

*Address correspondence to [ilancheziyan@dongguk.edu](mailto:ilancheziyan@dongguk.edu)

1. **Characterizations**

The morphological characteristics of ZnO NRs and M: ZnO NRs samples are analyzed by scanning electron microscopy (SEM) (JEOL JSM-6380, operated at 15 kV). High-resolution transmission electron microscopy (HRTEM, JEOL, JEM-2100F) was performed to analyze the crystalline structures of the ZnO NRs and M: ZnO NRs samples equipped with energy-dispersive X-ray spectroscopy EDS (with a resolution of 129 eV@Mn-Ka) for component analysis. The phase purity and crystal structure of ZnO NRs and M: ZnO NRs samples were inferred through Panalytical Xpert pro X-ray diffractometer with Cu-Kα radiation (40 kV, 30 mA, λ= 1.5418 Å). The Raman measurements were performed in a micro-Raman spectrometer using an excitation wavelength of 532 nm. The PL spectrum measured at 10 K of ZnO NRs and M: ZnO NRs obtained using He-Cd laser with 325 nm wavelength as excitation source. The chemical composition of ZnO NRs and M: ZnO NRs samples were obtained using X-ray photoelectron spectroscopy (Versa probe II, ULVAC-PHI, Inc.). A Digital oscilloscope (TDS 2012C, Tektronix, Inc.) and low-noise current preamplifier (model no. SR 570, Stanford Research Systems, Inc.) with a Keithley 2636B system were used for the measurement of the output voltages and current densities of the TENGs.

**Figure. S1**. TEM image of (a) smooth ZnO NRs, (b) M: ZnO NRs and (c) EDX spectra of smooth ZnO NRs and M: ZnO NRs.


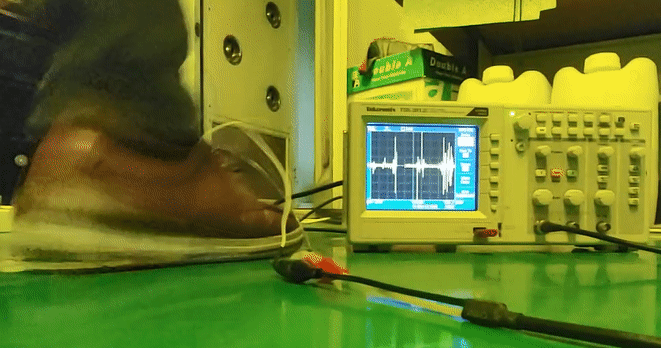


**Figure. S2**. Photographic image of voltage that can be spontaneously generated during the running process
